# Supplementary material
Source: PubMed Central journal article supplement (PMC6013375)
Supplement: NIHMS958120-supplement-SI.pdf [file NIHMS958120-supplement-SI.pdf]

## **Efficacious vaccine against heroin contaminated with fentanyl**

Candy S. Hwang, Lauren C. Smith, Yoshihiro Natori, Beverly Ellis, Bin Zhou, Kim D. Janda\*

Departments of Chemistry, Immunology and Microbial Science, Skaggs Institute for Chemical Biology; The Scripps Research Institute, La Jolla, CA, USA;

\*Address Correspondence to: Dr. Kim D. Janda, Department of Chemistry, BCC-582; 10550 North Torrey Pines Road; The Scripps Research Institute, La Jolla, CA 92037; USA; Phone: 1-858-784-2515; Fax: 858-784-2595; Email: kdjanda@scripps.edu

### **Supplemental Information**

|                                                                                                                                       |    |
|---------------------------------------------------------------------------------------------------------------------------------------|----|
| Figure S1. MALDI-TOF MS spectrum of unconjugated BSA.....                                                                             | 2  |
| Figure S2. MS-ESI(+) spectrum of unconjugated BSA .....                                                                               | 3  |
| Figure S4. MALDI-TOF MS spectrum of Fent-BSA, 0.5 h.....                                                                              | 5  |
| Figure S5. MALDI-TOF MS spectrum of Fent-BSA, 0.5 h (immunization batch) .....                                                        | 6  |
| Figure S6. MALDI-TOF MS spectrum of Fent-BSA, 0.75 h.....                                                                             | 7  |
| Figure S7. MALDI-TOF MS spectrum of Fent-BSA, 2h.....                                                                                 | 8  |
| Figure S8. MALDI-TOF MS spectrum of Fent-BSA, 3h.....                                                                                 | 9  |
| Figure S9. MALDI-TOF MS spectrum of Her-BSA, 1h.....                                                                                  | 10 |
| Figure S10. MALDI-TOF MS spectrum of Her-BSA, 1h (immunization batch) .....                                                           | 11 |
| Figure S11. MALDI-TOF MS spectrum of Her-BSA, 2h.....                                                                                 | 12 |
| Figure S12. MALDI-TOF MS spectrum of Her-BSA, 3h.....                                                                                 | 13 |
| Figure S13. Relative hapten copy numbers vs. conjugation time.....                                                                    | 14 |
| Table S1. Summary of MALDI-TOF results for heroin and fentanyl conjugates .....                                                       | 14 |
| Figure S14. Change in mouse body weights throughout vaccination schedule.....                                                         | 15 |
| Figure S15. Injection site reactions for each vaccination group.....                                                                  | 15 |
| Table S2. Log(IC <sub>50</sub> ) values ± SEM of all vaccination groups over time determined by SPR.....                              | 16 |
| Figure S16. Standard curves for blood-brain barrier concentrations .....                                                              | 17 |
| Figure S17. Blood-brain barrier concentrations of all drug metabolites .....                                                          | 18 |
| Figure S18. Log(IC <sub>50</sub> ) values ± SEM of Fent-KLH and admixture vaccinated mice against fentanyl and related analogues..... | 19 |

Figure S1. MALDI-TOF MS spectrum of unconjugated BSA

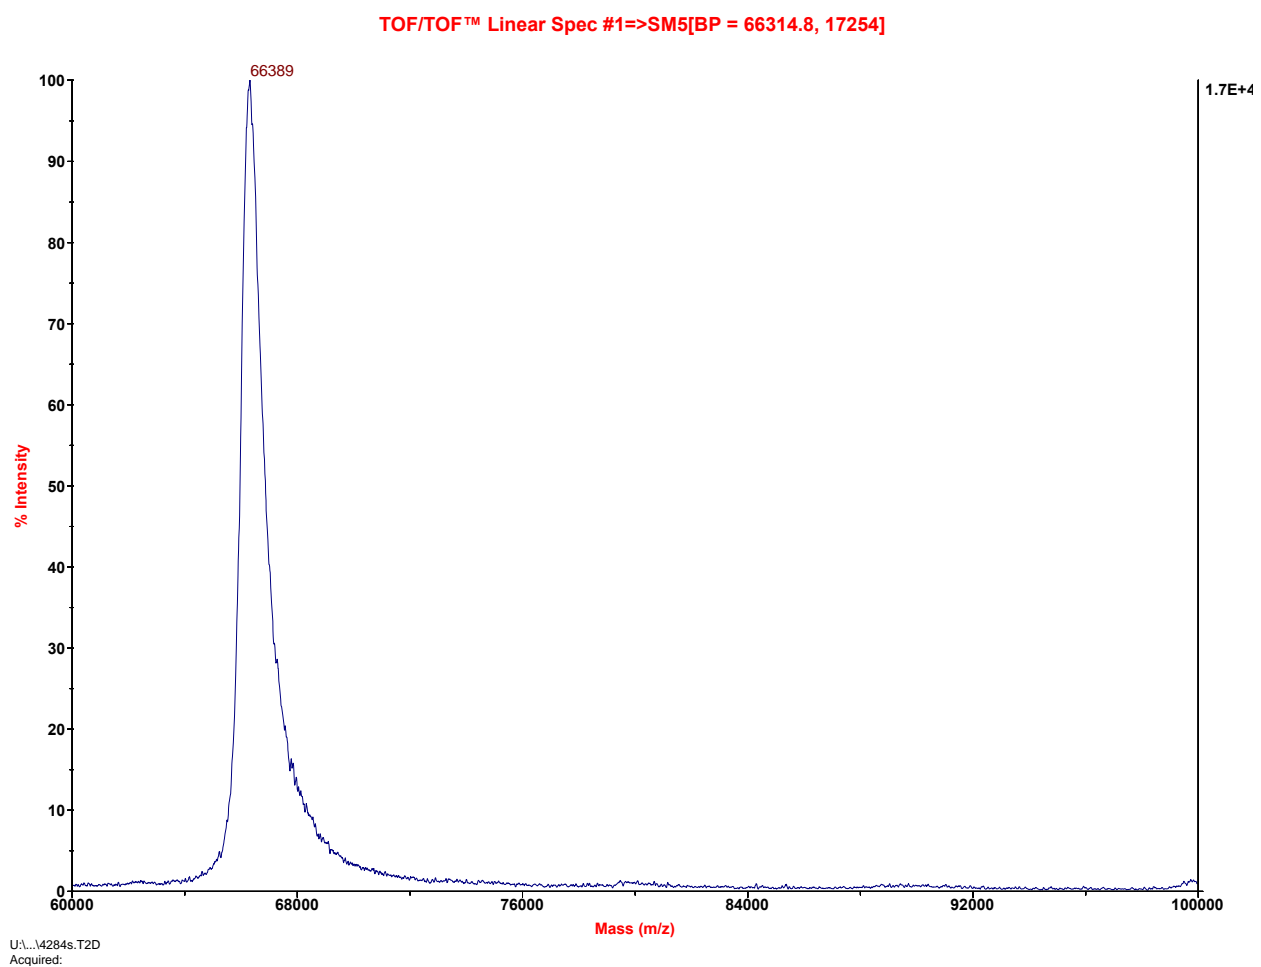

Figure S2. MS-ESI(+) spectrum of unconjugated BSA

|             |                   |                        |         |                 |                                  |
|-------------|-------------------|------------------------|---------|-----------------|----------------------------------|
| Sample Name | JACH4284          | Position               | P1-A2   | Instrument Name | Instrument 1                     |
| User Name   |                   | Inj Vol                | 8       | Inj Position    |                                  |
| Sample Type | Sample            | IRM Calibration Status | Success | Data Filename   | 092017_P_202_JACH4284.d          |
| ACQ Method  | routine_protein.m | Comment                |         | Acquired Time   | 9/20/2017 5:33:54 PM (UTC-07:00) |

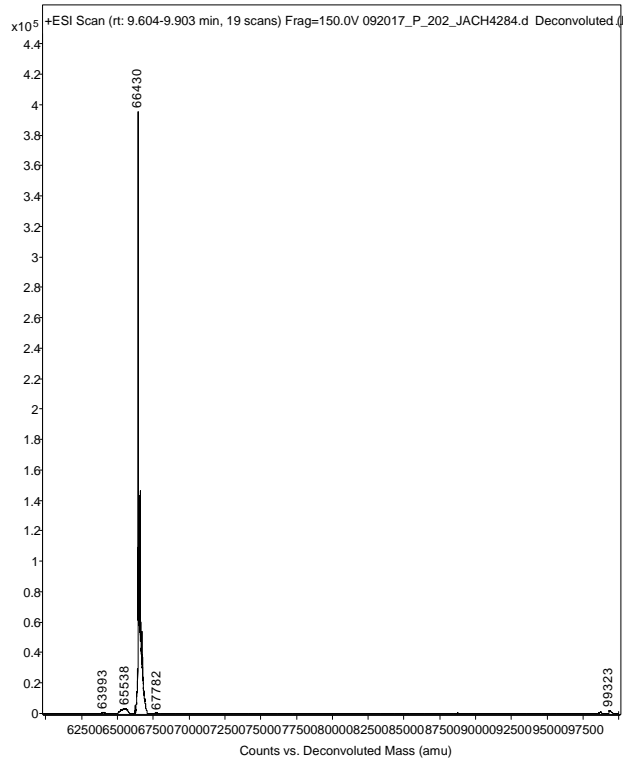

Figure S3. MALDI-TOF MS spectrum of Fent-BSA, 0.25 h

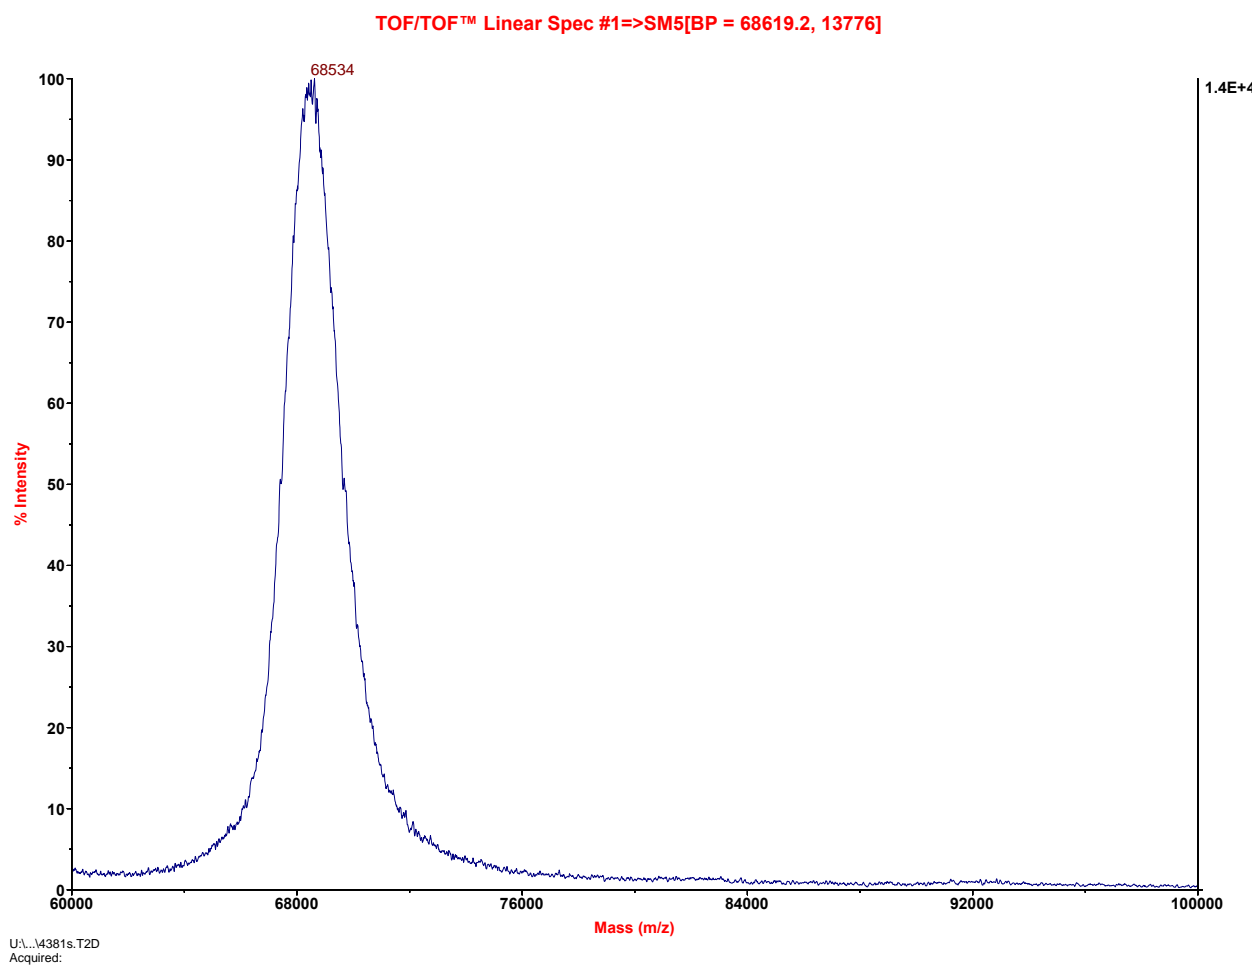

Figure S4. MALDI-TOF MS spectrum of Fent-BSA, 0.5 h

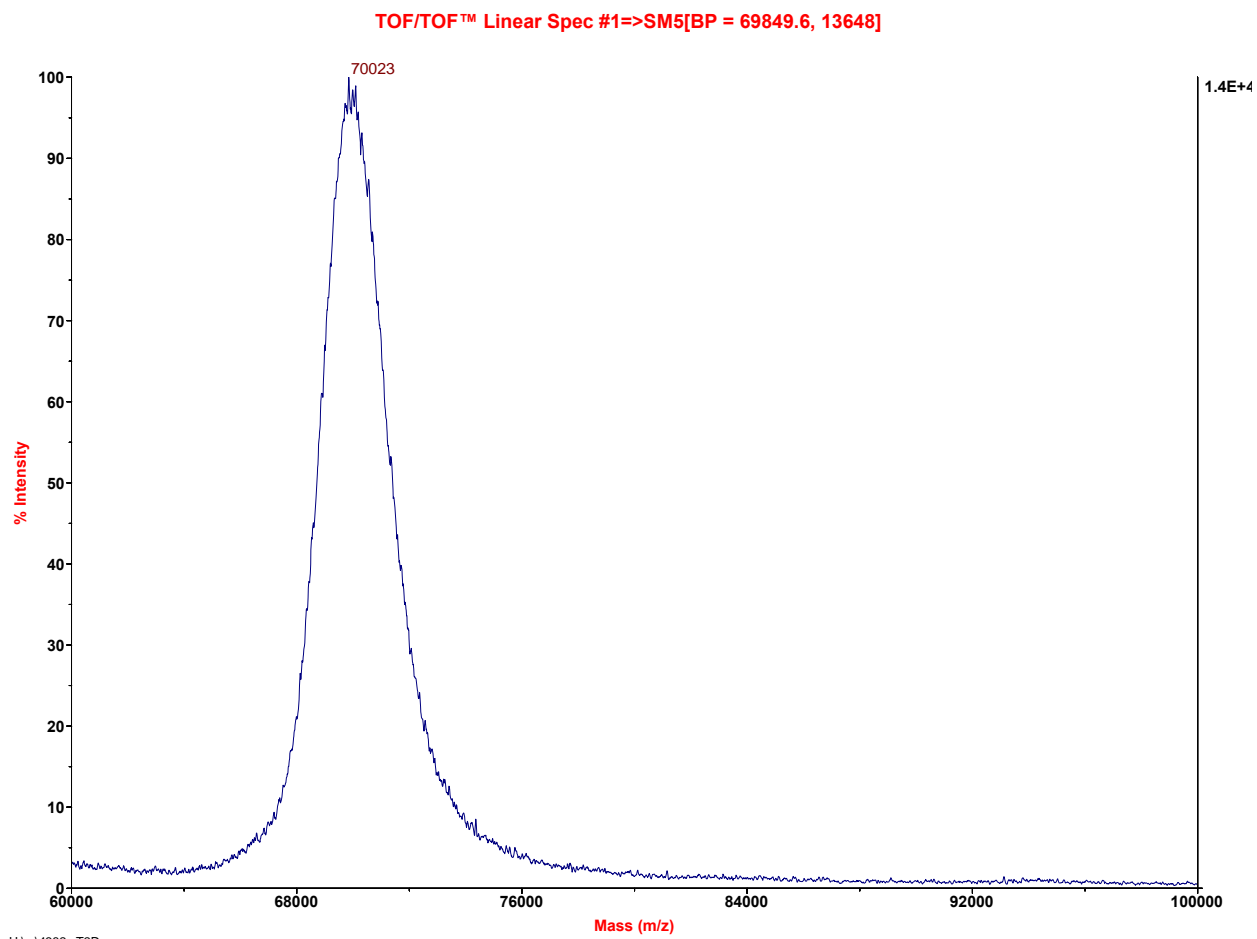

U:\...4382s.T2D  
Acquired:

Figure S5. MALDI-TOF MS spectrum of Fent-BSA, 0.5 h (immunization batch)

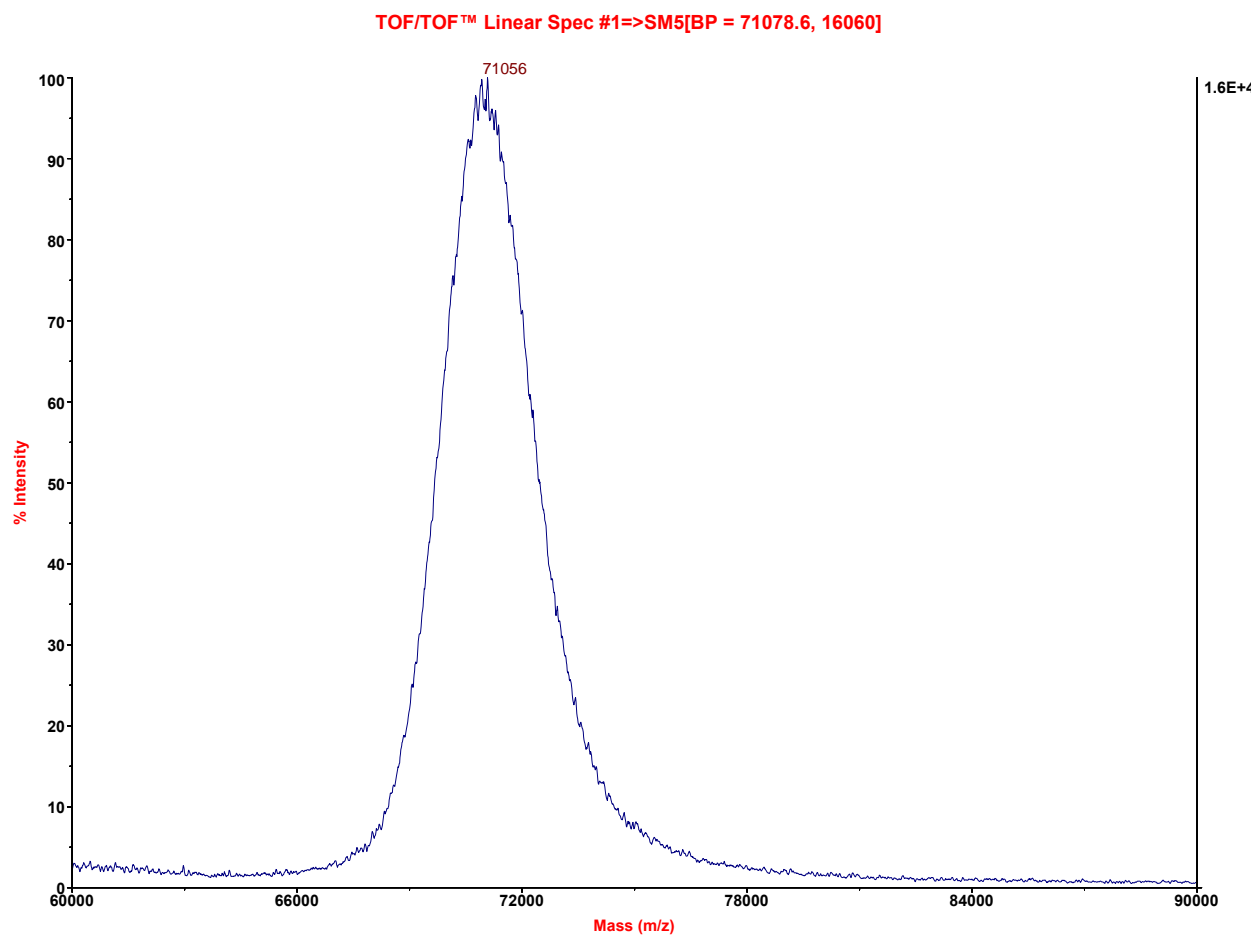

Z:\...4458s.T2D  
Acquired:

Figure S6. MALDI-TOF MS spectrum of Fent-BSA, 0.75 h

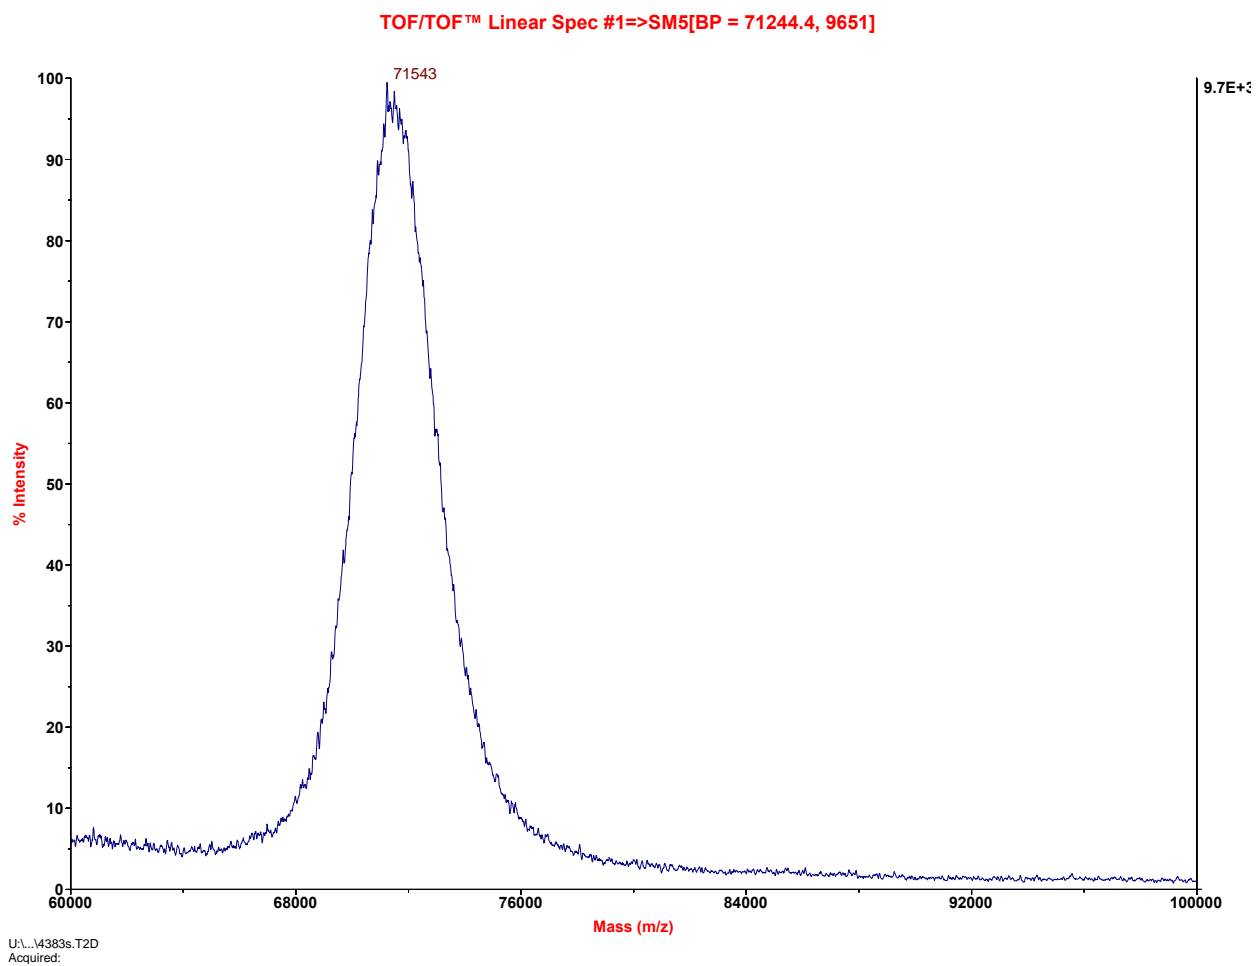

Figure S7. MALDI-TOF MS spectrum of Fent-BSA, 2h

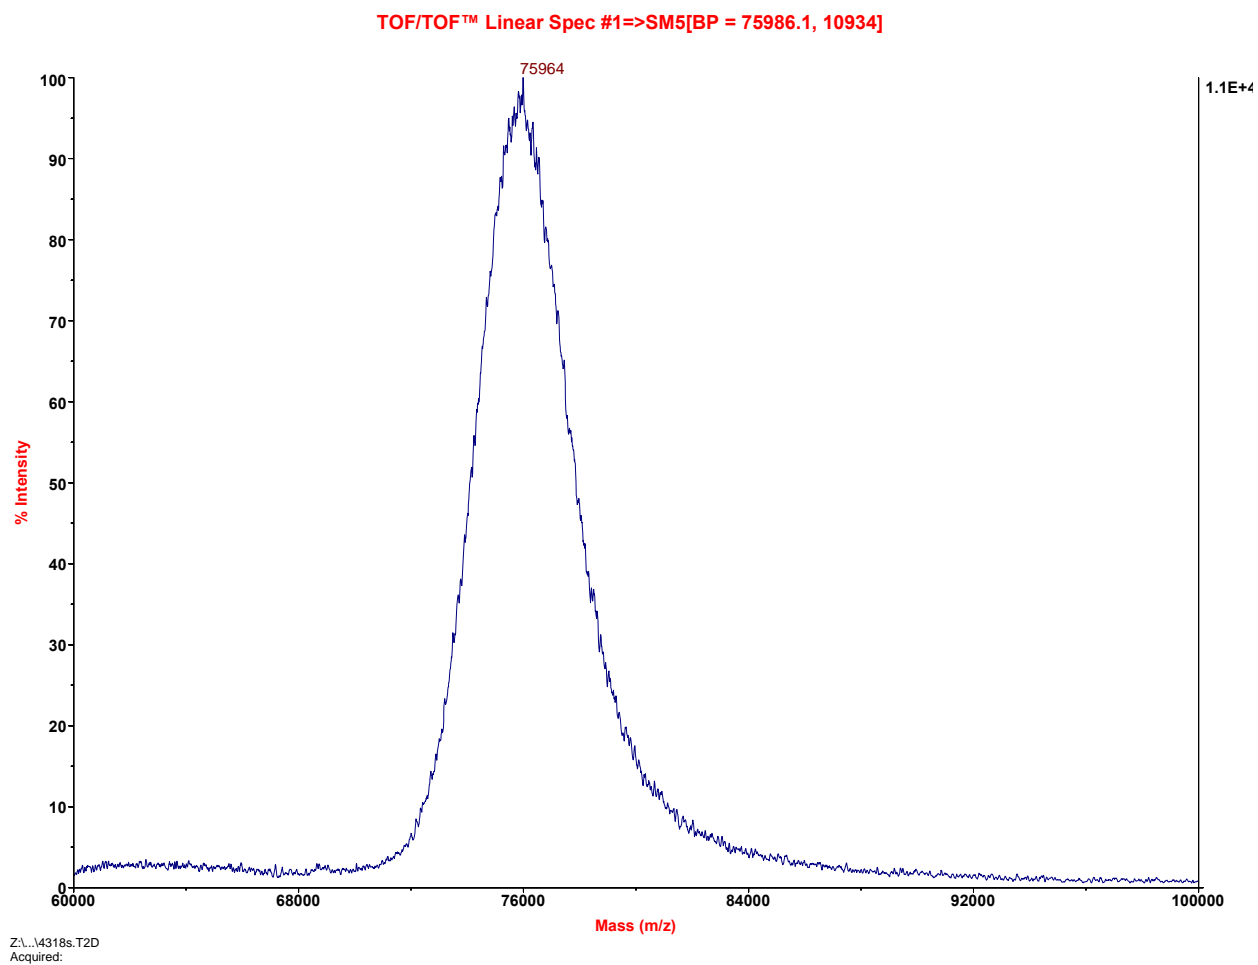



Figure S8. MALDI-TOF MS spectrum of Fent-BSA, 3h

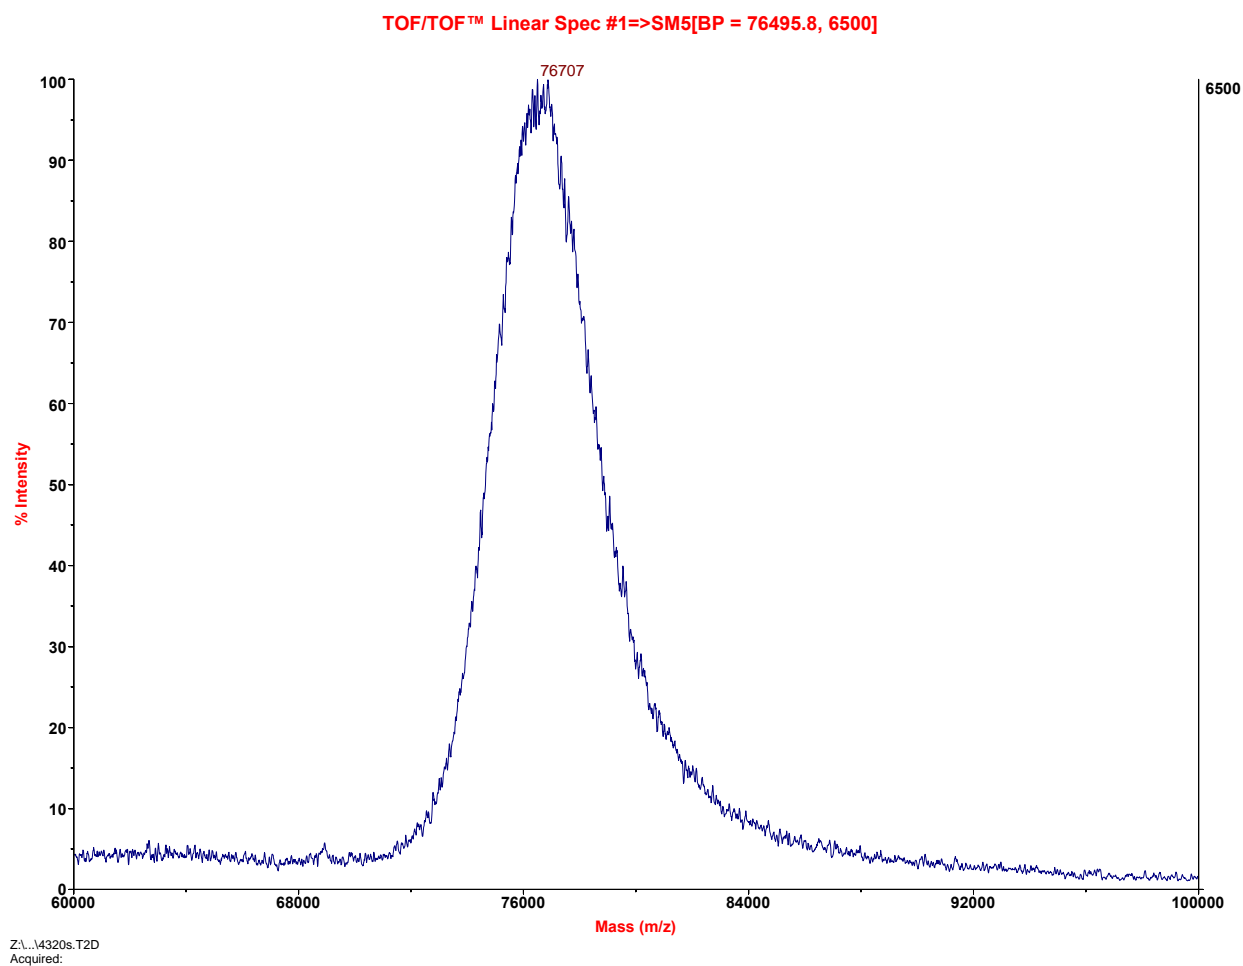

Figure S9. MALDI-TOF MS spectrum of Her-BSA, 1h

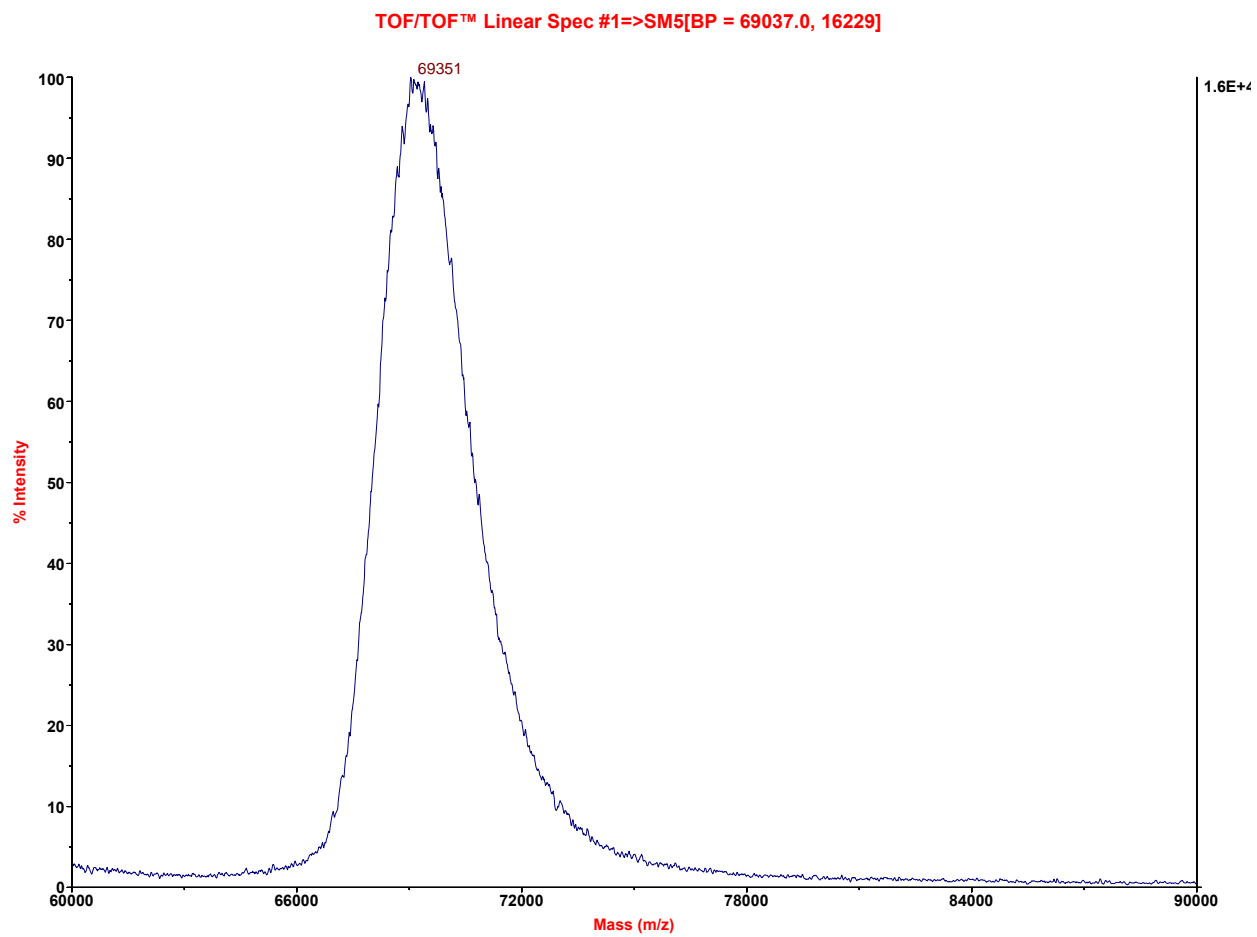

Z:\...4486s.T2D  
Acquired:

Figure S10. MALDI-TOF MS spectrum of Her-BSA, 1h (immunization batch)

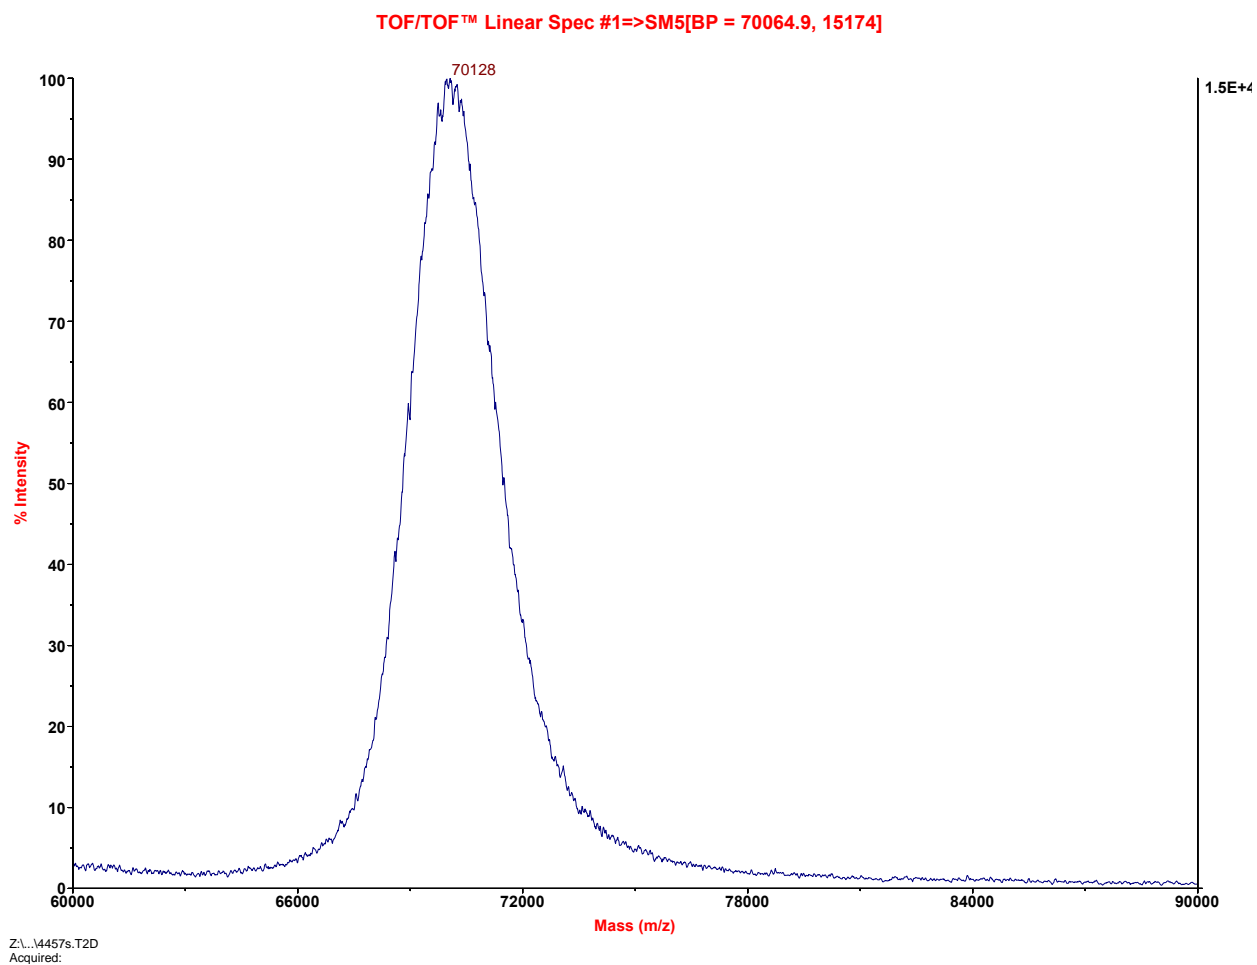

Figure S11. MALDI-TOF MS spectrum of Her-BSA, 2h

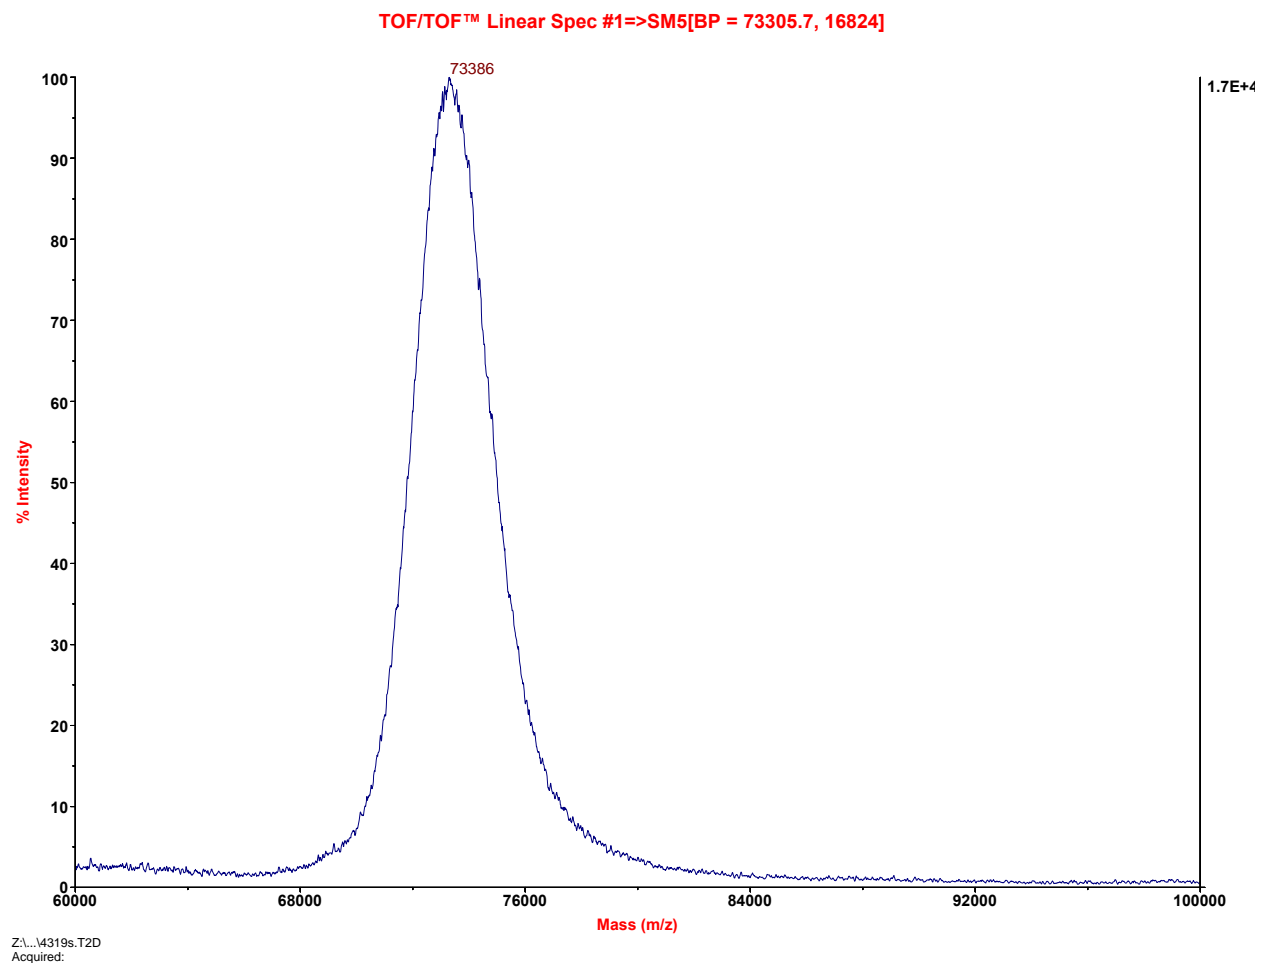

Figure S12. MALDI-TOF MS spectrum of Her-BSA, 3h

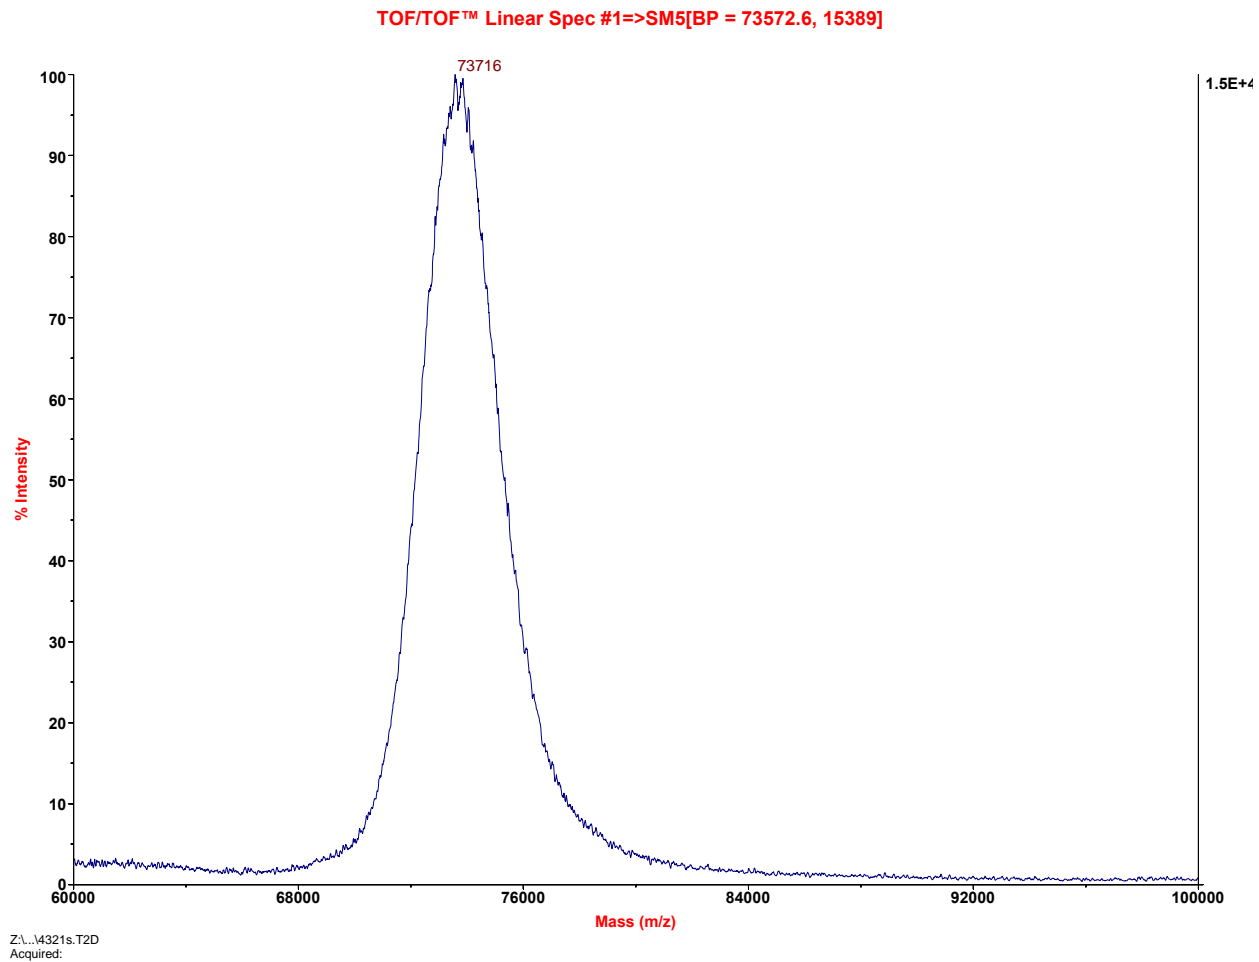

Figure S13. Relative hapten copy numbers vs. conjugation time

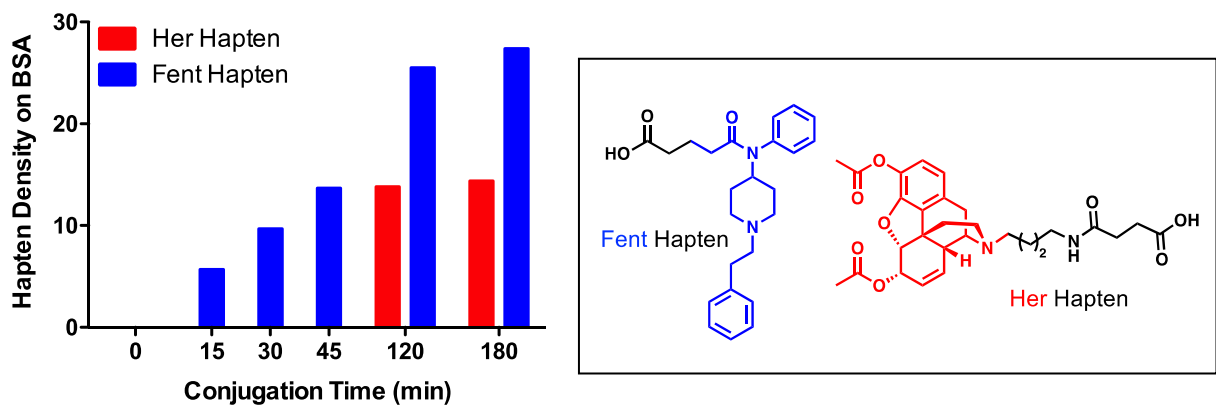

Table S1. Summary of MALDI-TOF results for heroin and fentanyl conjugates

| Hapten      | Conjugation Time (h) | MW           | Conjugation Number |
|-------------|----------------------|--------------|--------------------|
| BSA only    | N/A                  | 66389        | N/A                |
| Fent        | 0.25                 | 68534        | 5.7                |
| Fent        | 0.5                  | 70023        | 9.7                |
| <b>Fent</b> | <b>0.5</b>           | <b>71056</b> | <b>12.4</b>        |
| Fent        | 0.75                 | 71543        | 13.7               |
| Fent        | 2                    | 75964        | 25.5               |
| Fent        | 3                    | 76707        | 27.4               |
| <b>Her</b>  | <b>1</b>             | <b>70128</b> | <b>7.4</b>         |
| Her         | 2                    | 73386        | 13.8               |
| Her         | 3                    | 73716        | 14.4               |

Conditions in **bold** indicate BSA surrogates that represent the KLH batch used for immunization.

Figure S14. Change in mouse body weights throughout vaccination schedule

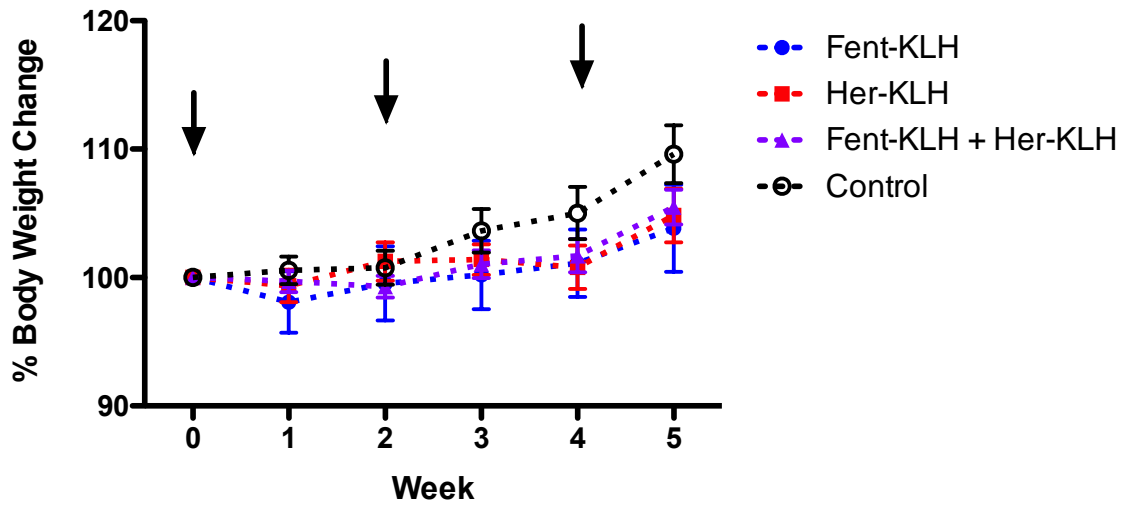

Figure S15. Injection site reactions for each vaccination group

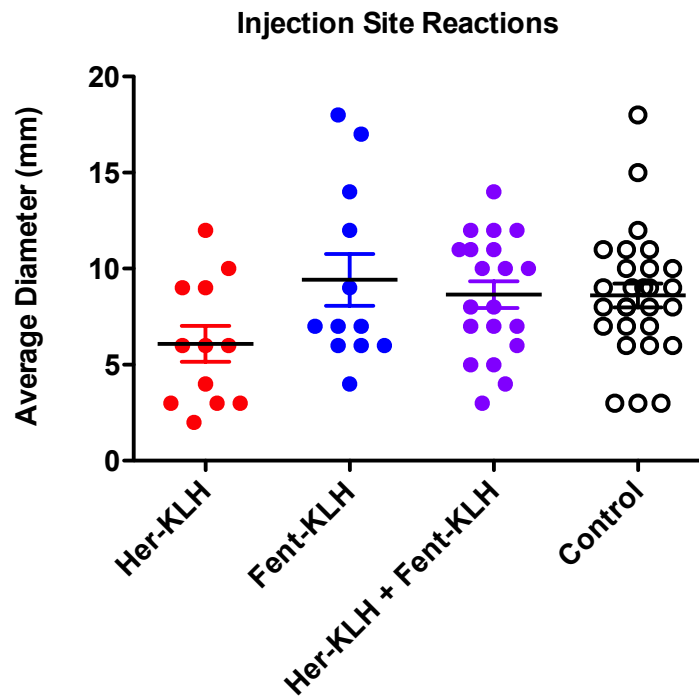

Table S2. Log(IC<sub>50</sub>) values ± SEM of all vaccination groups over time determined by SPR

| Vaccination Group  | Analyte               | Log(IC <sub>50</sub> ) ± SEM |                   |
|--------------------|-----------------------|------------------------------|-------------------|
|                    |                       | Week 3                       | Week 5            |
| Fent-KLH           | 6-AM <sup>a</sup>     | –                            | –                 |
|                    | Fentanyl              | -6.40 ± 0.12                 | -8.13 ± 0.03      |
| Her-KLH            | 6-AM <sup>b</sup>     | -6.50 ± 0.02                 | -6.66 ± 0.18      |
|                    | Fentanyl <sup>a</sup> | –                            | –                 |
| Fent-KLH + Her-KLH | 6-AM <sup>b</sup>     | -6.55 ± 0.05                 | -6.57 ± 0.73      |
|                    | Fentanyl              | -6.63 ± 0.09                 | -8.03 ± 0.03      |
| Control            | 6-AM <sup>b</sup>     | n.d. <sup>c</sup>            | n.d. <sup>c</sup> |
|                    | Fentanyl              | n.d. <sup>c</sup>            | n.d. <sup>c</sup> |

<sup>a</sup> 6-AM and fentanyl were not run for Fent-KLH and Her-KLH vaccination groups, respectively

<sup>b</sup> 6-AM was the primary analyte used in the SPR studies due to its longer half-life at pH 7.4 at rt compared to heroin. Heroin rapidly hydrolyzed during the experimental timeframe and therefore was not reported

<sup>c</sup> Control vaccine groups were run by SPR but did not converge due to lack of detected antibody binding



Figure S16. Standard curves for blood-brain barrier concentrations

Curves were generated using blank plasma or brain samples with known concentrations of heroin, 6-acetylmorphine, morphine, and fentanyl. The curves were used to quantify concentrations of drug in mice by LCMS analysis.

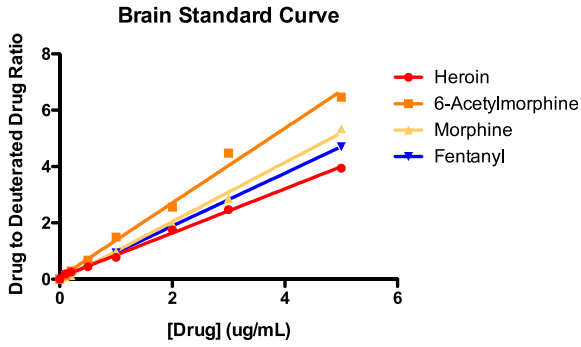

| Drug             | Standard Curve Equation | R <sup>2</sup> |
|------------------|-------------------------|----------------|
| Heroin           | $y = 0.785x + 0.0718$   | 0.998          |
| 6-Acetylmorphine | $y = 1.33x + 0.0594$    | 0.993          |
| Morphine         | $y = 1.05x - 0.0533$    | 0.996          |
| Fentanyl         | $y = 0.939x + 0.00885$  | 1.00           |

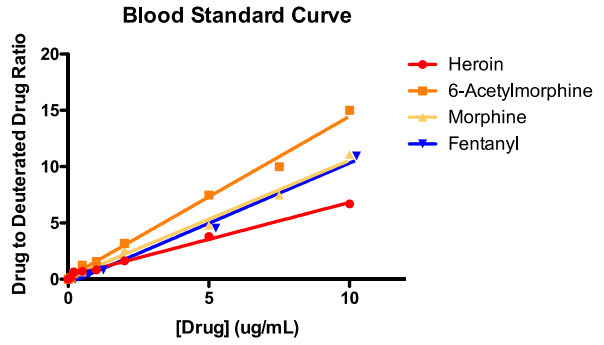

| Drug             | Standard Curve Equation | R <sup>2</sup> |
|------------------|-------------------------|----------------|
| Heroin           | $y = 0.655x + 0.270$    | 0.993          |
| 6-Acetylmorphine | $y = 1.42x + 0.118$     | 0.994          |
| Morphine         | $y = 1.04x + 0.118$     | 0.991          |
| Fentanyl         | $y = 1.07x - 0.104$     | 0.993          |

Figure S17. Blood-brain barrier concentrations of all drug metabolites

Bars show means + SEM. Significance is denoted by an asterisk from a two-way ANOVA and a Dunnett *post hoc* test when comparing vaccinated groups to vaccinated controls. \* $P < 0.05$  and \*\*\*\* $P < 0.0001$  versus control.

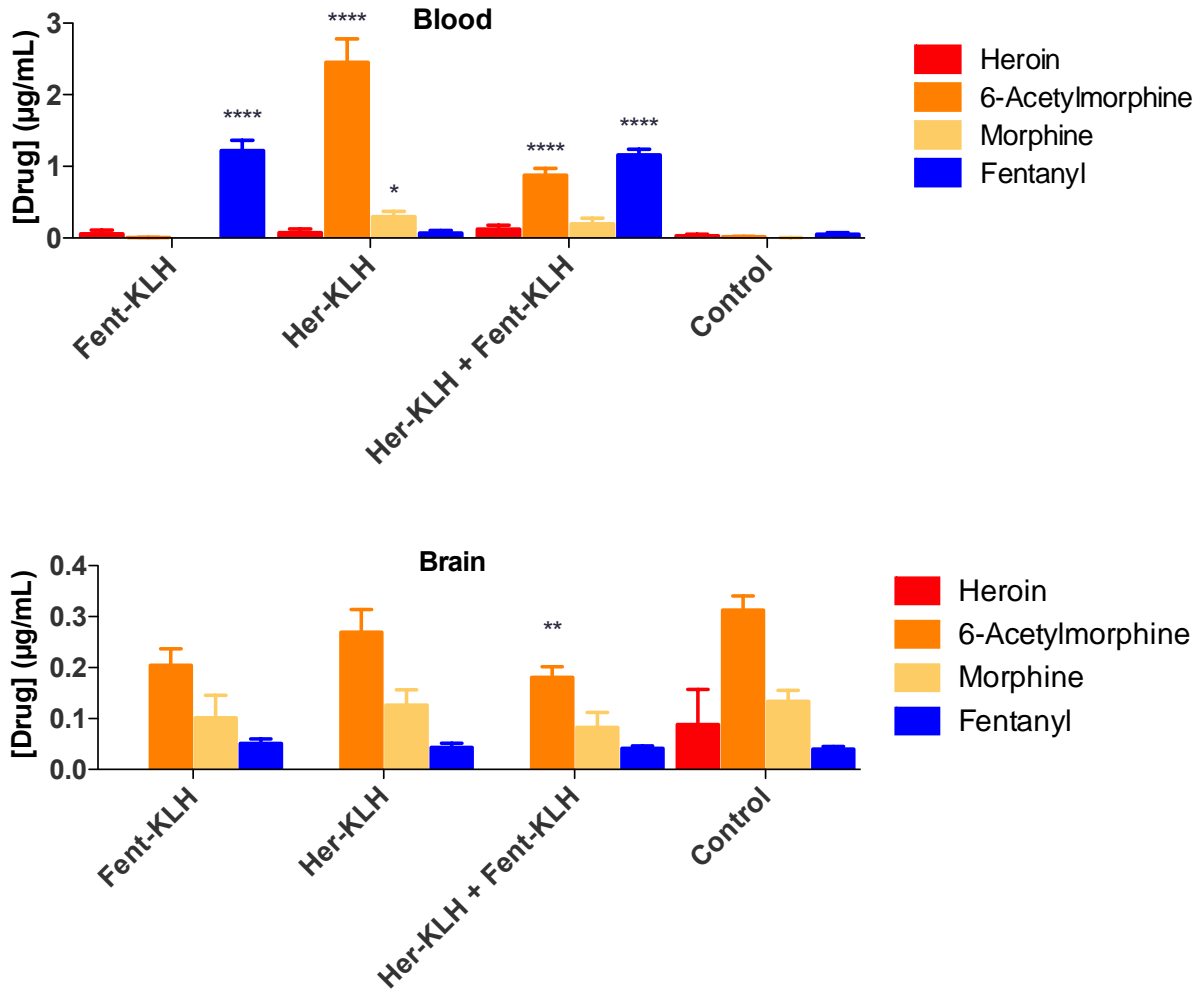

Figure S18. Log(IC<sub>50</sub>) values ± SEM of Fent-KLH and admixture vaccinated mice against fentanyl and related analogues

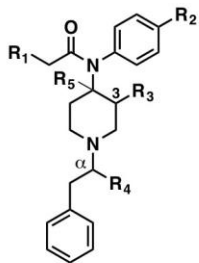

- A. Fentanyl hapten: R<sub>1</sub>=(CH<sub>2</sub>)<sub>2</sub>COOH  
 B. Fentanyl: R<sub>1</sub>=Me  
 C. Acetylfentanyl: R<sub>1</sub>=H  
 D. Butylfentanyl: R<sub>1</sub>=Pr  
 E. Tolyfentanyl: R<sub>1</sub>=Me, R<sub>2</sub>=Me  
 F. 3-Methylfentanyl: R<sub>1</sub>=Me, R<sub>3</sub>=Me  
 G. α-Methylfentanyl: R<sub>1</sub>=Me, R<sub>4</sub>=Me  
 H. Carfentanil: R<sub>1</sub>=Me, R<sub>5</sub>=COOMe  
 Unspecified R Groups = H

|         |                  | Log(IC <sub>50</sub> ) ± SEM |                    |
|---------|------------------|------------------------------|--------------------|
| Analyte |                  | Fent-KLH                     | Fent-KLH + Her-KLH |
| B.      | Fentanyl         | -8.13 ± 0.03                 | -8.03 ± 0.03       |
| C.      | Acetylfentanyl   | -8.30 ± 0.06                 | -8.08 ± 0.01       |
| D.      | Butylfentanyl    | -8.26 ± 0.09                 | -8.16 ± 0.05       |
| E.      | Tolyfentanyl     | -7.54 ± 0.05                 | -7.54 ± 0.04       |
| F.      | 3-Methylfentanyl | -6.56 ± 0.06                 | -6.60 ± 0.04       |
| G.      | α-Methylfentanyl | -6.94 ± 0.03                 | -6.85 ± 0.07       |
| H.      | Carfentanil      | -6.82 ± 0.09                 | -6.86 ± 0.08       |
